# Supplementary material
Source: Springer Nature journal article supplement (https://www.springermedizin.de/resource/supplementary/13063_2008_397_MOESM1_ESM.pdf/9617902)
Supplement: MOESM1 [file 9617902]

**Enrolment**

Assessed for Eligibility n = 236

Excluded n = 8  
Not meeting inclusion criteria n = 8  
Refused to participate n = 0  
Other reasons n = 0

Randomised n = 228

**Allocation**

Allocated to high dose intervention n = 57  
Received allocated intervention n = 57  
Did not receive allocated intervention n = 0

Allocated to medium dose intervention n = 56  
Received allocated intervention n = 55  
Did not receive allocated intervention n = 1 (wrong pack)

Allocated to low dose intervention n = 58  
Received allocated intervention n = 56  
Did not receive allocated intervention n = 2 (ineligible, wrong pack )

Allocated to matching placebo n = 57  
Received allocated intervention n = 57  
Did not receive allocated intervention n = 0

**Follow up**

Lost to follow up n = 0  
Discontinued trial n = 1 (allergy (1))

Lost to follow up n = 4 (withdrew consent (2) discharged (1) transfer (1))  
Discontinued trial n = 1 (discharged (1))

Lost to follow up n = 3 (discharged(1), not known (2))  
Discontinued trial n = 6 (ineligible (1), transfer (2), withdrew consent (2), Due to trial treatment suspension (1))

Lost to follow up n = 0  
Discontinued trial n = 2 (transfer (1), due to trial treatment suspension (1))

**Analysis**

Analysed n = 57  
Excluded from analysis n = 0

Analysed n = 52  
Excluded from analysis n = 4 (withdrew consent (2) discharged (1) transfer (1))

Analysed n = 54  
Excluded from analysis n = 4 (ineligible (1), discharged (1), not known (2))

Analysed n = 57  
Excluded from analysis n = 0
